# Supplementary material for: MicroRNA-130b targets PTEN to mediate drug resistance and proliferation of breast cancer cells via the PI3K/Akt signaling pathway
Source: PubMed Central journal article supplement (PMC5292739; doi:10.1038/srep41942), 2017-02-06
Supplement: srep41942-s1.pdf [file srep41942-s1.pdf]

## Supplementary Information for

### MicroRNA-130b targets PTEN to mediate drug resistance and proliferation of breast cancer cells via the PI3K/Akt signaling pathway

Yuan Miao, Wei Zheng, Nana Li, Zhen Su, Lifeng Zhao, Huimin Zhou,  
Li Jia\*

\*Correspondence and requests for materials should be addressed to L.J.  
(jali0386@sina.com)

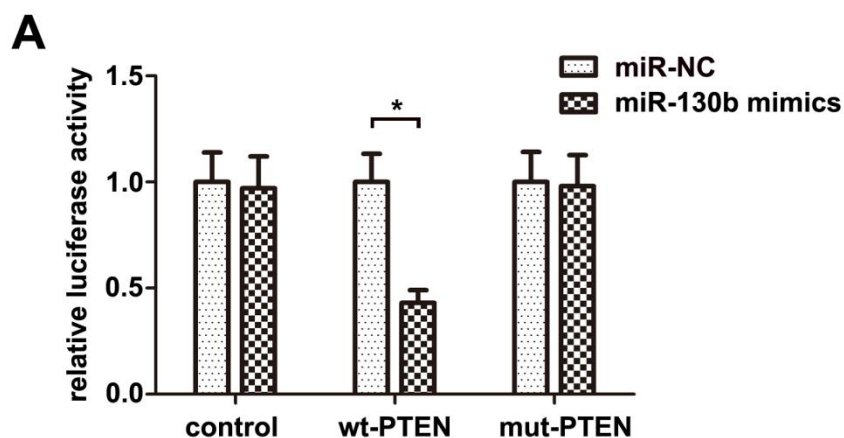

**Figure 1. PTEN is a direct target gene of miR-130b.** A. The relative luciferase activity of MCF-7 cells was detected by luciferase assay after the pGL3-control vector, wt or mut PTEN 3'UTR genes were co-transfected with miR-NC or miR-130b mimics. (\* $P < 0.05$ ). The results are showed as mean  $\pm$  SD of three independent experiments.
